# Supplementary material
Source: publisher figshare collection journal article supplement (https://tandf.figshare.com/articles/dataset/_/3083809)
Supplement: Supplementary file 1 [file 1]

**Prognostic Implications of Mean Platelet Volume on Short- and Long-term Outcomes  
Among Patients with Non-ST-segment Elevation Myocardial Infarction Treated with  
Percutaneous Coronary Intervention: A Single-center Large Observational Study**

Jarosław Wasilewski<sup>1</sup>, Piotr Desperak<sup>1</sup>, Michał Hawranek<sup>1</sup>, Aneta Ciślak<sup>1</sup>, Tadeusz Osadnik<sup>1</sup>,  
Łukasz Pyka<sup>1</sup>, Marcin Gawlita<sup>2</sup>, Kamil Bujak<sup>2</sup>, Jacek Niedziela<sup>1</sup>, Michał Krawczyk<sup>2</sup>, Mariusz  
Gąsior<sup>1</sup>

<sup>1</sup> 3rd Chair and Department of Cardiology, SMDZ in Zabrze, Medical University of Silesia,  
Katowice, Poland

<sup>2</sup> School of Medicine with the Division of Dentistry in Zabrze, Medical University of Silesia,  
Katowice, Poland

**Supplementary material descriptions:**

Supplementary Material 1. Study scheme.

Supplementary Material 2. A ROC analysis of the 12-month Composite End Point depending on  
the mean platelet volume at admission.

Supplementary Material 3. A ROC analysis of the 12-month Mortality depending on the mean  
platelet volume at admission.
